# Supplementary material
Source: HighWire-hosted journal article supplement (https://www.rcpjournals.org/highwire/filestream/11670/field_highwire_adjunct_files/0/S2_History_template.pdf)
Supplement: S2_History_template.pdf [file S2_History_template.pdf]

## S2. History template.

Dear Sir/Madam,

If you have a mobile phone on you, please turn this on so we may call you to ask some of the following questions.

**1. How is your breathing?**

|       |               |        |
|-------|---------------|--------|
| Worse | Much the same | Better |
|-------|---------------|--------|

**2. How is your cough?**

|       |               |        |
|-------|---------------|--------|
| Worse | Much the same | Better |
|-------|---------------|--------|

**3. Are you producing any phlegm (spit)?**

|     |    |
|-----|----|
| Yes | No |
|-----|----|

**4. How is your appetite?**

|                     |      |
|---------------------|------|
| Good/normal for you | Poor |
|---------------------|------|

**5. How is your fluid intake?**

|      |               |       |
|------|---------------|-------|
| Good | Much the same | Worse |
|------|---------------|-------|

**6. Do you have any pain? If so, where and can you describe it?**

**7. How are your bowels?**

|        |           |              |
|--------|-----------|--------------|
| Normal | Diarrhoea | Constipation |
|--------|-----------|--------------|

**8. Are you passing urine?**

|                |                 |                 |
|----------------|-----------------|-----------------|
| Normal amounts | More than usual | Less than usual |
|----------------|-----------------|-----------------|

Thank you.

The Royal Bournemouth Hospital
